# Supplementary material for: The Anti-Cancer Multikinase Inhibitor Sorafenib Impairs Cardiac Contractility by Reducing Phospholamban Phosphorylation and Sarcoplasmic Calcium Transients
Source: PubMed Central journal article supplement (PMC5871797; doi:10.1038/s41598-018-23630-w), 2018-03-28
Supplement: 41598_2018_23630_MOESM1_ESM.pdf [file 41598_2018_23630_MOESM1_ESM.pdf]

# Supplementary Information

## **The Anti-Cancer Multikinase Inhibitor Sorafenib Impairs Cardiac Contractility by Reducing Phospholamban Phosphorylation and Sarcoplasmic Calcium Transients**

Christopher Schneider<sup>1</sup>, Markus Wallner<sup>1,2</sup>, Ewald Kolesnik<sup>1</sup>, Viktoria Herbst<sup>1</sup>, Heinrich Mächler<sup>3</sup>, Martin Pichler<sup>4,5</sup>, Dirk von Lewinski<sup>1</sup>, Simon Sedej<sup>1,6</sup>, Peter P. Rainer<sup>1,7\*</sup>

<sup>1</sup> Division of Cardiology, Medical University of Graz, Austria

<sup>2</sup> Cardiovascular Research Center, Lewis Katz School of Medicine, Temple University, Philadelphia, PA, USA

<sup>3</sup> Division of Cardiac Surgery, Medical University of Graz, Austria

<sup>4</sup> Division of Oncology, Medical University of Graz, Austria

<sup>5</sup> Department of Experimental Therapeutics, UT MD Anderson Cancer Center, Houston, TX, USA

<sup>6</sup> BioTechMed Graz, Austria

<sup>7</sup> Division of Cardiology, Johns Hopkins University School of Medicine, Baltimore, MD, USA

\* Corresponding author, email: [herzforschung@gmail.com](mailto:herzforschung@gmail.com)

## Supplementary Figure S1

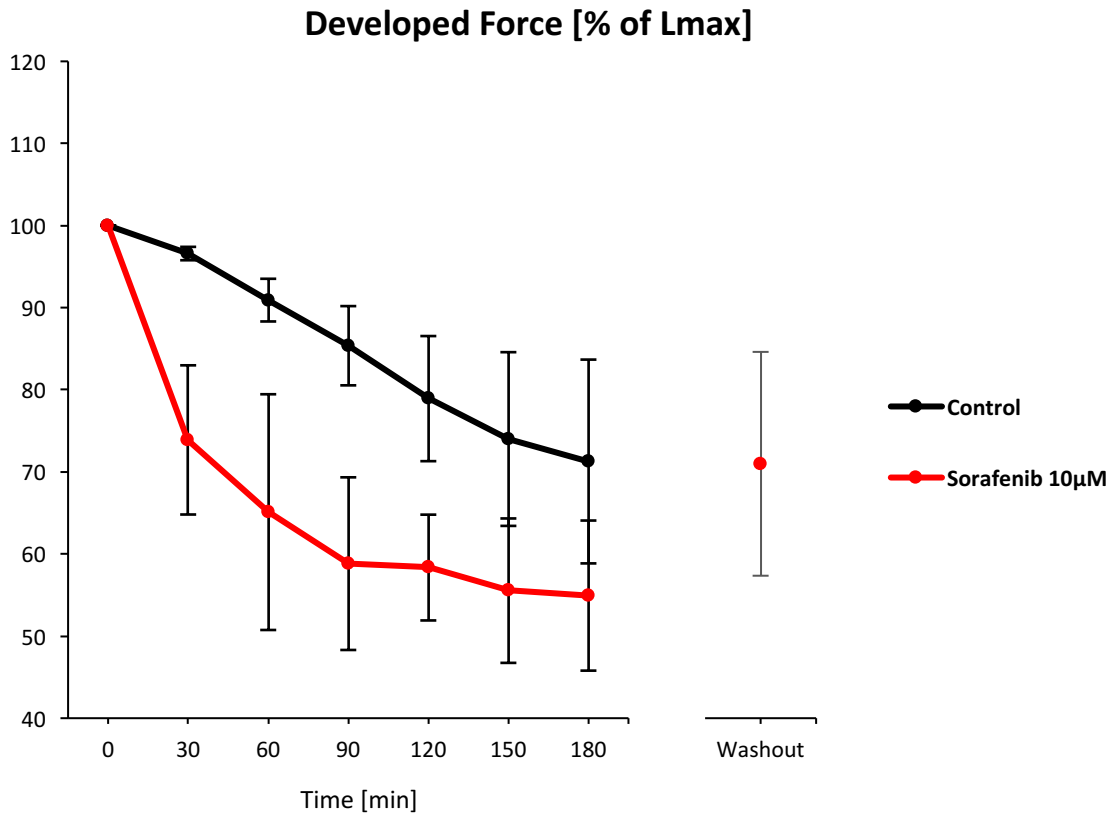

**Fig. S1. Sorafenib-induced negative inotropy is sustained over several hours and remains reversible.**  $n=3/4$  trabeculae from 4 hearts,  $p<0.05$  for all sorafenib time-points vs. baseline and for the 150- and 180-minute time points for control vs. baseline (inherent natural run-down of atrial muscle preparations in the organ bath). Developed force of sorafenib-treated muscles did not differ from control after wash-out ( $p=0.94$ ).

## Supplementary Figure S2

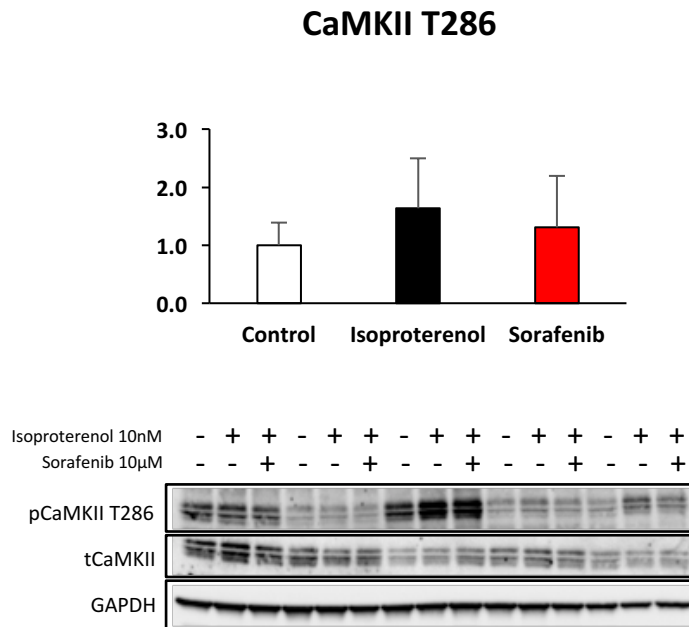

**Fig. S2. CaMKII phosphorylation at threonine 286 is not acutely affected by sorafenib.** Summary data (above) and original blots (below). n=5 hearts per group. For complete western blots see Supplementary Figure S4.

## Supplementary Figure S3

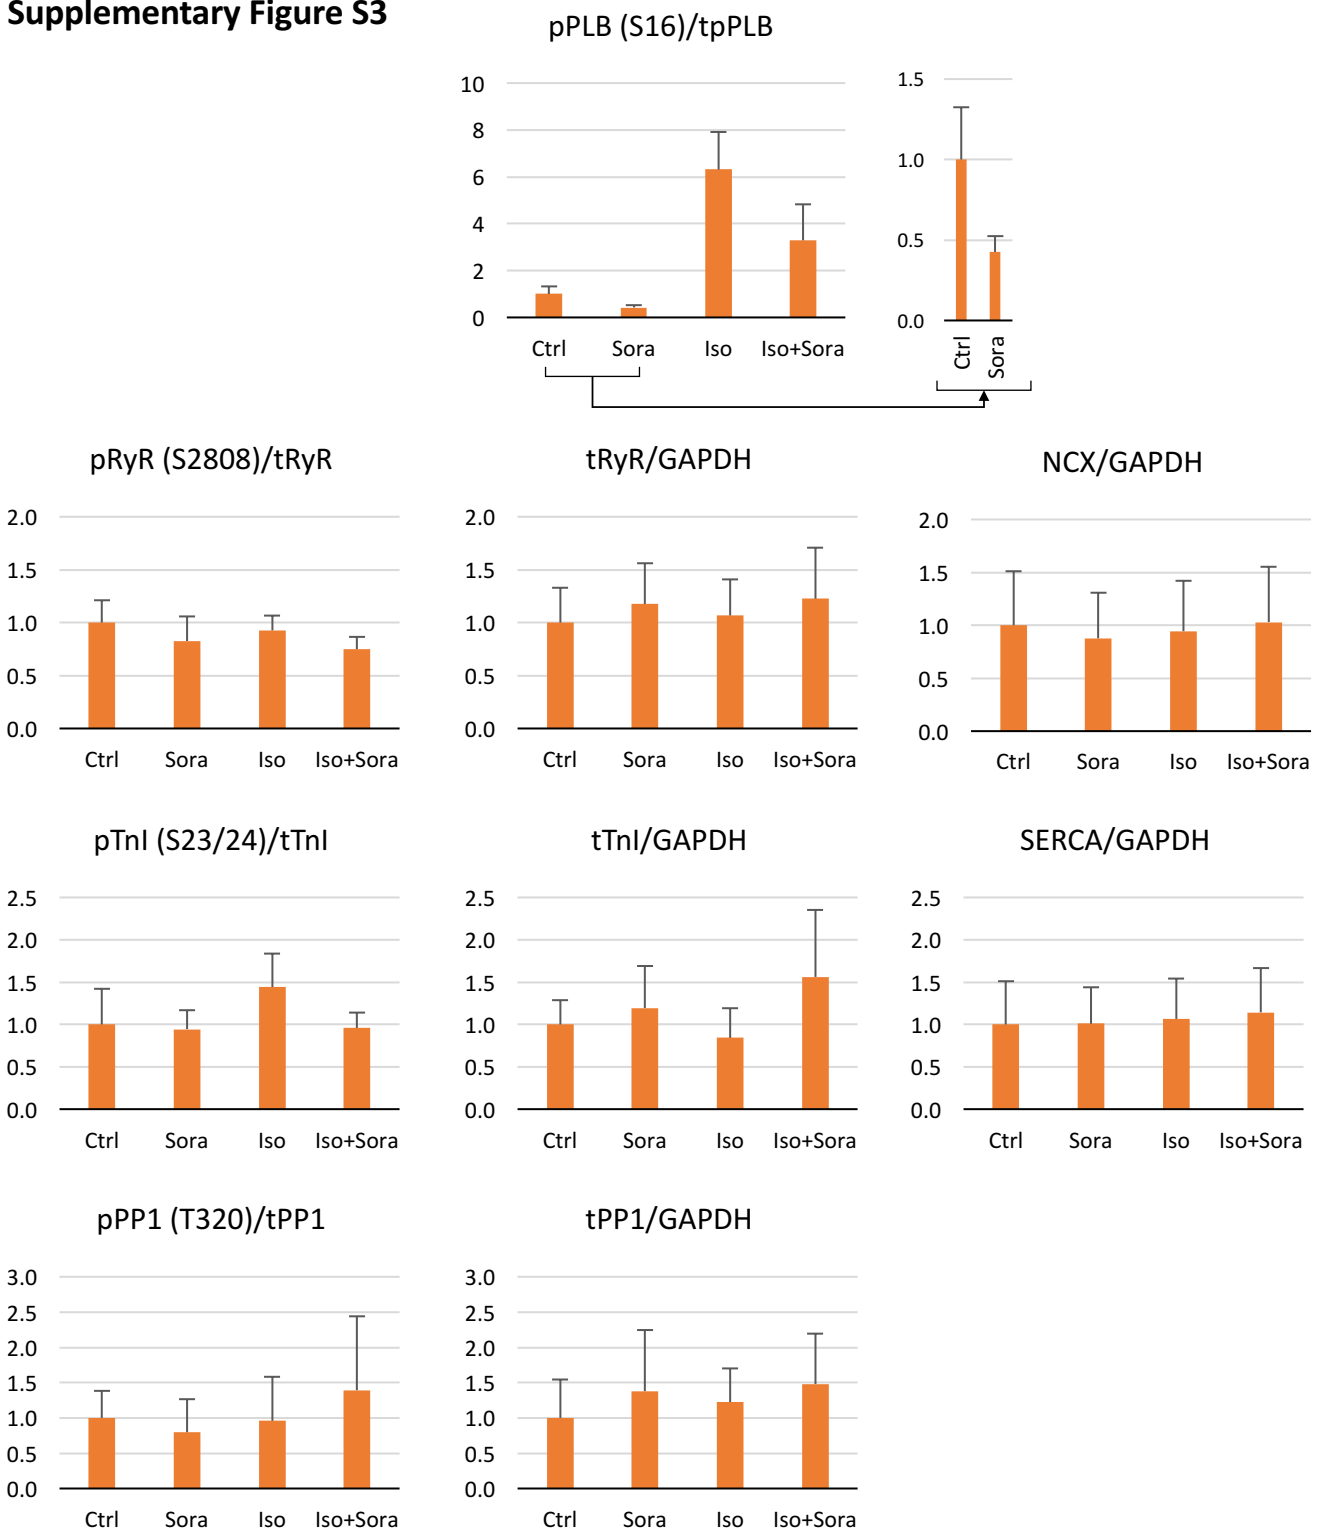

**Fig. S3. Phosphorylation and expression of PLB, RyR, NCX, SERCA2a, PP1 $\alpha$ , and troponin I in dependence of sorafenib (10 $\mu$ M) and/or isoproterenol (10nM).** Adult murine cardiomyocytes were freshly isolated, pre-treated with sorafenib for 5 minutes and exposed to 10 minutes of isoproterenol; fold-changes are provided, n=4-6 hearts.

## Supplementary Figure S4

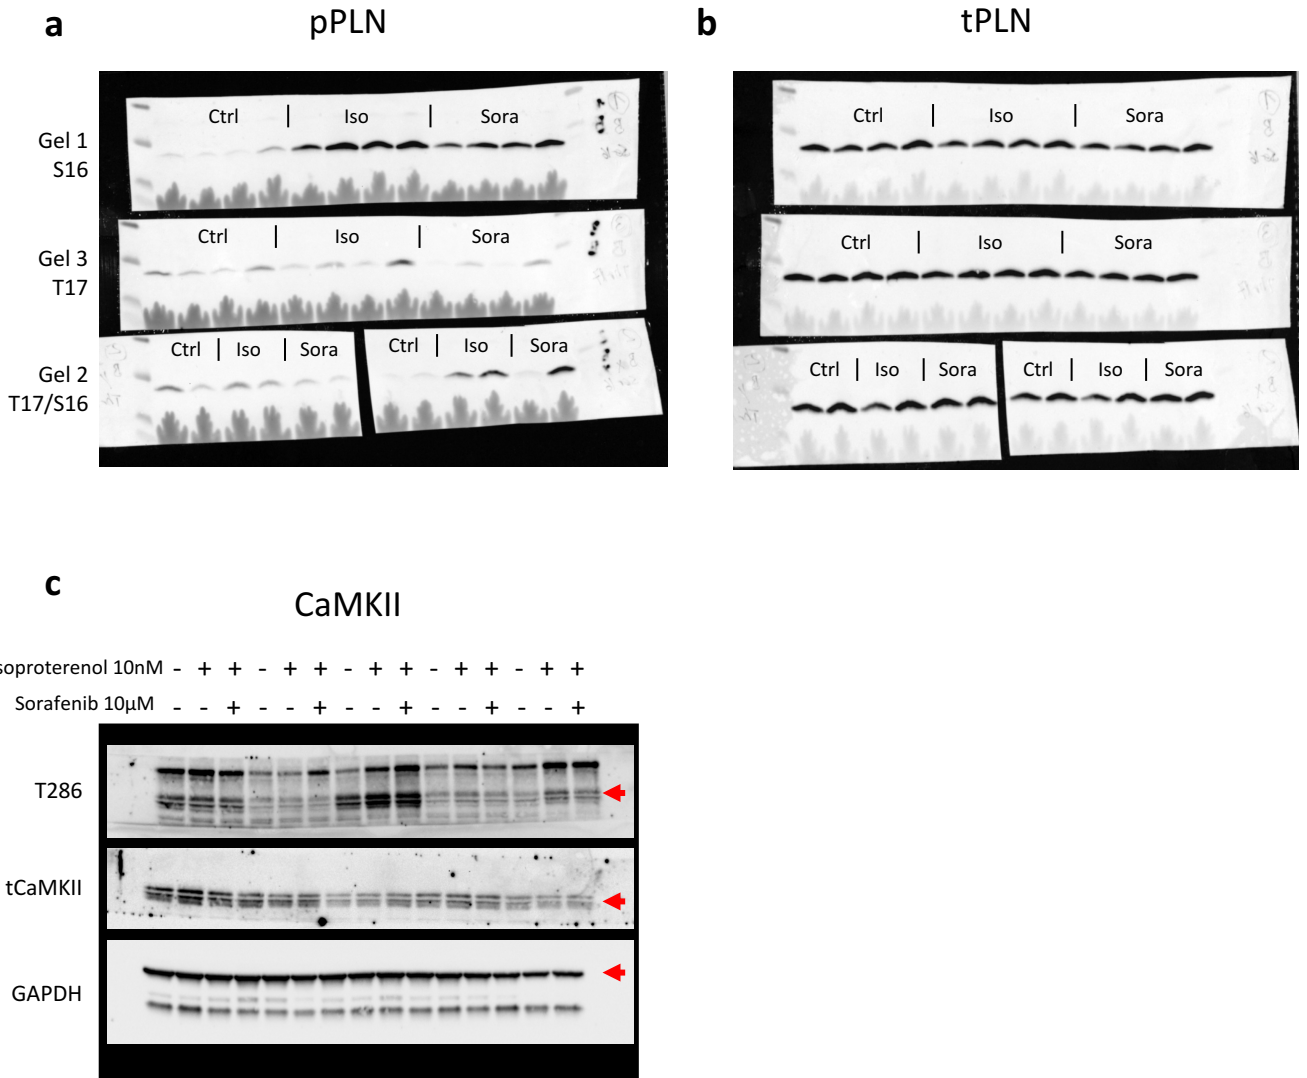

**Fig. S4. Uncropped Western Blots.** pPLN S16 and T17 (a), tPLN (b), pCaMKII T286, tCaMKII, and GAPDH (c).
